# Supplementary material for: Impaired innate immune alveolar macrophage response and the predilection for COPD exacerbations
Source: HighWire-hosted journal article supplement (doi:10.1136/thoraxjnl-2013-203669), 2014-03-31
Supplement: thoraxjnl-2013-203669supp.pdf [file thoraxjnl-2013-203669supp.pdf]

## **Impaired innate immune alveolar macrophage response and the predilection for COPD exacerbations**

Charles S. Berenson, Ragina L. Kruzel, Ellana Eberhardt, Ree Dolnick, Hans Minderman, Paul K. Wallace, Sanjay Sethi

### **ON-LINE SUPPLEMENTAL DATA**

#### **Subject criteria**

Participants were over 30 years of age. Of 96 participants with COPD, nine were lost to follow-up for monitoring of exacerbations. All participants underwent clinical assessment, routine spirometry and chest x-rays. Ex-smokers had expired breath carbon monoxide of <0.02ppm (Vitalograph Breath CO Monitor, Lenexa, KS).

For all COPD participants, exclusion criteria included a forced expiratory volume at one second (FEV<sub>1</sub>) <35%, hypercapnia and co-morbid diseases that would render bronchoscopy unsafe. Inclusion criteria were: 1) chronic bronchitis by history and/or emphysema by chest x-ray or CT; 2) absence of other lung disease, including asthma and bronchiectasis, based on clinical evaluation; 3) chest x-ray findings that were normal or compatible with COPD, but detected no other disease; 4) FEV<sub>1</sub>/FVC ratio below the 95% lower confidence limit of normal on spirometry; 5) non-atopic by history; 6) no antibiotic or systemic steroid use for four weeks preceding enrollment. Healthy non-smokers met all inclusion criteria of the COPD group, except #1 and #4 (above) and that all had never smoked (E1).

### **Exacerbation criteria**

Participants were followed at six week intervals by telephone contact and by six and twelve month clinic visits, at which they were evaluated for occurrence of exacerbation in the intervening period. They were questioned about episodes of increased shortness of breath, increased sputum production or change in sputum color. Exacerbations were defined as an increase in one or more of these symptoms lasting over 24 hours, necessitating evaluation and treatment by a health care provider.

### **Purification of alveolar macrophages**

Macrophages were cultured in RPMI1640 (BioWhittaker, Walkersville, MD) and human AB-positive serum (Nabi, Miami FL). Alveolar macrophages were purified from individual BALs and seeded onto 48 well tissue culture plates ( $10^5$  cells/ml) in RPMI1640/10% AB-positive serum, supplemented with penicillin-streptomycin (100 U/ml) (E1). After incubation (5% CO<sub>2</sub>, 95% humidity, 37°C) for 24 hours, non-adherent cells were removed. Remaining alveolar macrophages were consistently 98-100% esterase-positive (E1). Percent viability of alveolar macrophages (mean±SEM), by trypan blue exclusion, was 89.1±1.2, 88.7±0.9 and 89.6±.7 for Groups 1, 2 and 3 respectively (p>0.1).

### **Macrophage-bacteria incubation**

Each bacterial strain was fully viable in 8% antibody-depleted serum (E2). Antibody-depleted human serum was purified by Protein G affinity chromatography (Amersham, Piscataway, NJ) as a complement source, as previously described (E3). All three bacterial strains were obtained from sputum from COPD patients. All were associated with COPD exacerbations

and all elicited a systemic and/or mucosal antibody response to the infecting strain, following the COPD exacerbations, making these strains more relevant to clinical COPD exacerbations than laboratory or type strains. All experiments included control wells treated with *E. coli* K235 LPS (1µg/ml) (Sigma Chemical Co., St. Louis MO) or buffer diluents of each antigen.

### **TLR expression**

Alveolar macrophages ( $2 \times 10^5$  cells/well) were adhered on Lab-Tek chamber slides (Nunc Inc., Naperville, IL). Macrophages were co-incubated with each bacterial strain (MOI-200:1). Anti-human-TLR2 and-TLR4 were purchased from eBiosciences, San Diego, CA. Cells were incubated with anti-human TLR2-FITC or anti-TLR4 (final concentration-1µg/ml) for one hour at 37°C in light-protected containers. After repeated rinses with PBS to remove unbound antibody, TLR4-stained cells were incubated with FITC-F(ab')<sub>2</sub> goat anti-mouse IgG (1:50) (Invitrogen Corp, Camarillo, CA) for 30 min at 4°C and then rinsed with PBS. Cells were kept protected from light and were analyzed by immunofluorescent image capture microscopy.

### **NF-κB activation**

Because of limited numbers of alveolar macrophages, studies were performed with macrophages of ten non-exacerbation-prone and four exacerbation-prone donors. Alveolar macrophages were incubated with respiratory bacteria (NTHI, MC, SP at 1:200) or with buffer alone (3 hrs). Plated cells were removed from wells and centrifuged (5min at 500rpm; 4°C). Protein content of nuclear extracts was quantitated by Lowry assay to obtain 20 µg nuclear protein from  $4-8 \times 10^6$  cells for each condition (E4). Cell pellets were resuspended in detergent-containing hypotonic buffer with centrifuged at 14000xg for 30sec (4°C). The pellet containing

nuclear extract was resuspended and incubated on a rocking platform (150rpm) in lysis buffer (30min.), before centrifugation (14000xg for 10min). Supernatant was stored at -80°C. Using reagents from manufacturer, 30ul of binding buffer followed by 20ul of nuclear extract in lysis buffer was added to each well. Control wells of buffer alone and p50 protein standards were included. Plates were sealed and incubated (one hour, room temp). After vigorous washing, 100ul of antibody to NF-κB (p50; 1:1000) was added and incubated for one hour. HRP-conjugated secondary antibody 100ul; 1:1000) was added after vigorous washing and incubated (one hr). 100ul developing solution was incubated for 1-3 min. Reactions were terminated at the appearance of color change and absorbance was read at 450nm.

## **REFERENCES**

Sethi S, Maloney J, Grove L, et al. Airway inflammation and bronchial bacterial colonization in chronic obstructive pulmonary disease. *Am J Respir Crit Care Med* 2006;173:991-998.

Berenson CS, Patterson MA, Pattoli MA, et al. A monoclonal antibody to human macrophage gangliosides inhibits macrophage migration. *J Leukoc Biol* 1996; 59:371-379.

Yi K, Sethi S, Murphy TF. Human immune response to nontypeable *Haemophilus influenzae* in chronic bronchitis. *J Infect Dis* 1997; 176:1247-1252.

Berenson CS, Wrona CT, Grove LJ, et al. Impaired alveolar macrophage response to *Haemophilus* antigens in chronic obstructive lung disease. *Am J Resp Crit Care Med* 2006; 173:991-998.

Lowry OH, Rosebrough, NJ, Farr AL, et al. Protein measurement with the folin phenol reagent. *J Biol Chem* 1951:193, 265-275.

Online Supplement Table 1-Multivariate logistic regression tables - Immunologic outcomes with significant association with exacerbation status were analyzed for independent association with age and FEV<sub>1</sub>.

IL-8 induction

| Independent variable | Odds Ratio | 95% CI      | p value |
|----------------------|------------|-------------|---------|
| Age                  | 1.014      | 0.962-1.068 | 0.614   |
| FEV <sub>1</sub>     | 0.500      | 0.212-1.179 | 0.113   |
| Log IL-8 (NTHI)      | 0.371      | 0.158-0.874 | 0.023   |

| Independent variable | Odds Ratio | 95% CI      | p value |
|----------------------|------------|-------------|---------|
| Age                  | 1.025      | 0.972-1.080 | 0.363   |
| FEV <sub>1</sub>     | 0.595      | 0.251-1.411 | 0.239   |
| Log IL-8 (MC)        | 0.377      | 0.145-0.981 | 0.046   |

| Independent variable | Odds Ratio | 95% CI      | p value |
|----------------------|------------|-------------|---------|
| Age                  | 1.015      | 0.964-1.069 | 0.565   |
| FEV <sub>1</sub>     | 0.464      | 0.196-1.098 | 0.081   |
| Log IL-8 (SP)        | 0.435      | 0.190-0.997 | 0.049   |

| Independent variable            | Odds Ratio | 95% CI      | p value |
|---------------------------------|------------|-------------|---------|
| Age                             | 1.024      | 0.974-1.077 | 0.353   |
| FEV <sub>1</sub>                | 0.533      | 0.227-1.251 | 0.148   |
| Log IL-8 (Pam <sub>3</sub> Cys) | 0.455      | 0.195-1.059 | 0.068   |

| Independent variable | Odds Ratio | 95% CI      | p value |
|----------------------|------------|-------------|---------|
| Age                  | 1.025      | 0.975-1.078 | 0.337   |
| FEV <sub>1</sub>     | 0.564      | 0.236-1.351 | 0.199   |
| Log IL-8 (LPS)       | 0.400      | 0.170-0.842 | 0.036   |

Multivariate logistic regression tables (continued)

TNF- $\alpha$  induction

| Independent variable     | Odds Ratio | 95% CI      | p value |
|--------------------------|------------|-------------|---------|
| Age                      | 1.031      | 0.979-1.085 | 0.252   |
| FEV <sub>1</sub>         | 0.512      | 0.221-1.185 | 0.118   |
| Log TNF- $\alpha$ (NTHI) | 0.804      | 0.646-1.000 | 0.0499  |

| Independent variable   | Odds Ratio | 95% CI      | p value |
|------------------------|------------|-------------|---------|
| Age                    | 1.030      | 0.980-1.083 | 0.241   |
| FEV <sub>1</sub>       | 0.515      | 0.224-1.184 | 0.118   |
| Log TNF- $\alpha$ (MC) | 0.851      | 0.694-1.045 | 0.123   |

| Independent variable                     | Odds Ratio | 95% CI      | p value |
|------------------------------------------|------------|-------------|---------|
| Age                                      | 1.028      | 0.978-1.080 | 0.272   |
| FEV <sub>1</sub>                         | 0.521      | 0.224-1.213 | 0.130   |
| Log TNF- $\alpha$ (Pam <sub>3</sub> Cys) | 0.798      | 0.567-1.124 | 0.196   |

| Independent variable    | Odds Ratio | 95% CI      | p value |
|-------------------------|------------|-------------|---------|
| Age                     | 1.025      | 0.975-1.078 | 0.335   |
| FEV <sub>1</sub>        | 0.451      | 0.187-1.087 | 0.076   |
| Log TNF- $\alpha$ (LPS) | 0.722      | 0.553-0.942 | 0.017   |

TLR expression

| Independent variable | Odds Ratio | 95% CI      | p value |
|----------------------|------------|-------------|---------|
| Age                  | 1.006      | 0.971-1.042 | 0.735   |
| FEV <sub>1</sub>     | 0.929      | 0.929-0.482 | 0.826   |
| TLR2 (MC)            | 0.691      | 0.625-0.764 | <0.01   |

| Independent variable | Odds Ratio | 95% CI      | p value |
|----------------------|------------|-------------|---------|
| Age                  | 0.998      | 0.963-1.034 | 0.893   |
| FEV <sub>1</sub>     | 0.582      | 0.304-1.111 | 0.101   |
| TLR2 (SP)            | 0.770      | 0.711-0.833 | <0.01   |

Online Supplement Table 2 - Comparison of cytokine induction results was made with measured values compared with values corrected for individual baseline cytokine values.

| COPD Groups   |                           | Bacterial strains    |                           |                                 |                           |                                 |                           |
|---------------|---------------------------|----------------------|---------------------------|---------------------------------|---------------------------|---------------------------------|---------------------------|
|               |                           | NTHI<br>11P6H1       |                           | <i>M. catarrhalis</i><br>6P29B1 |                           | <i>S. pneumoniae</i><br>25P55S1 |                           |
|               |                           | Uncorrected<br>value | Corrected<br>for baseline | Uncorrected<br>value            | Corrected<br>for baseline | Uncorrected<br>value            | Corrected<br>for baseline |
| IL-8          | Nonexacerbation-prone     | 2365<br>[4250.5]     | 993.0<br>[1848.3]         | 1710<br>[3383.8]                | 903.3<br>[2300.8]         | 1165<br>[2137.4]                | 270.5<br>[1246.0]         |
|               | Exacerbation-prone        | 775 [2814]           | 321.5<br>[1213.6]         | 870 [2586]                      | 344.8<br>[1514.6]         | 460 [1319]                      | 13.9 [392.5]              |
|               | Mann Whitney U<br>p value | 0.024                | 0.022                     | 0.045                           | 0.059                     | 0.046                           | 0.013                     |
| TNF- $\alpha$ | Nonexacerbation-prone     | 0 [19.2]             | 0.6 [38.9]                | 16.1 [515.0]                    | 3.0 [43.9]                | ND                              | ND                        |
|               | Exacerbation-prone        | 0 [4.3]              | 0 [3.9]                   | 7.0 [112.4]                     | 0 [5.18]                  | ND                              | ND                        |
|               | Mann Whitney U<br>p value | 0.046                | 0.07                      | 0.08                            | 0.03                      | ND                              | ND                        |

Online Supplement Table 2 (continued)

|               |                           | TLR Ligands       |                        |                      |                        |
|---------------|---------------------------|-------------------|------------------------|----------------------|------------------------|
| COPD Groups   |                           | LPS               |                        | Pam <sub>3</sub> Cys |                        |
|               |                           | Uncorrected value | Corrected for baseline | Uncorrected value    | Corrected for baseline |
| IL-8          | Nonexacerbation-prone     | 1220 [1617]       | 341.0 [1082.6]         | 1160 [2179]          | 480.0 [1152.8]         |
|               | Exacerbation-prone        | 500 [1361]        | 33.4 [347.8]           | 640 [1440]           | 90.0 [519.0]           |
|               | Mann Whitney U<br>p value | 0.028             | 0.022                  | 0.074                | 0.029                  |
| TNF- $\alpha$ | Nonexacerbation-prone     | 18.8 [91.9]       | 17.1 [82.8]            | 53.5 [119.8]         | 52.7 [120.1]           |
|               | Exacerbation-prone        | 4.7 [20.5]        | 4.5 [20.6]             | 21.3 [60.6]          | 21.3 [60.6]            |
|               | Mann Whitney U<br>p value | 0.015             | 0.015                  | 0.049                | 0.050                  |
