# Supplementary material for: Impaired innate immune alveolar macrophage response and the predilection for COPD exacerbations
Source: HighWire-hosted journal article supplement (doi:10.1136/thoraxjnl-2013-203669), 2014-03-31
Supplement: thoraxjnl-2013-203669supp_figure1.pdf [file thoraxjnl-2013-203669supp_figure1.pdf]

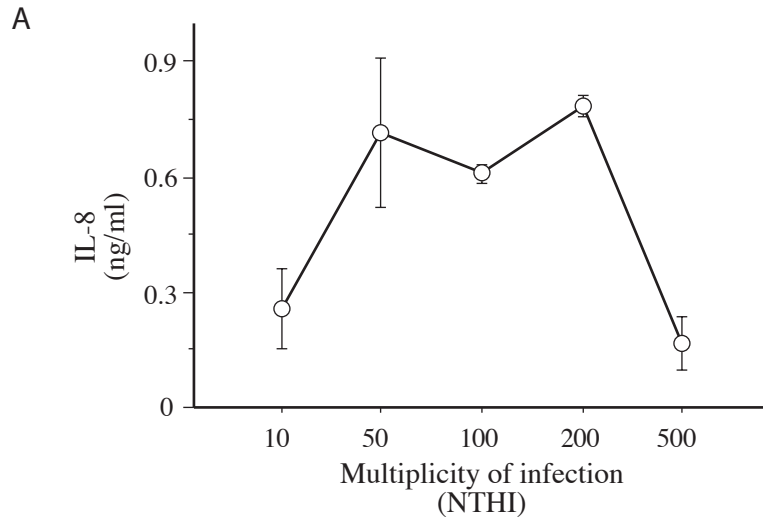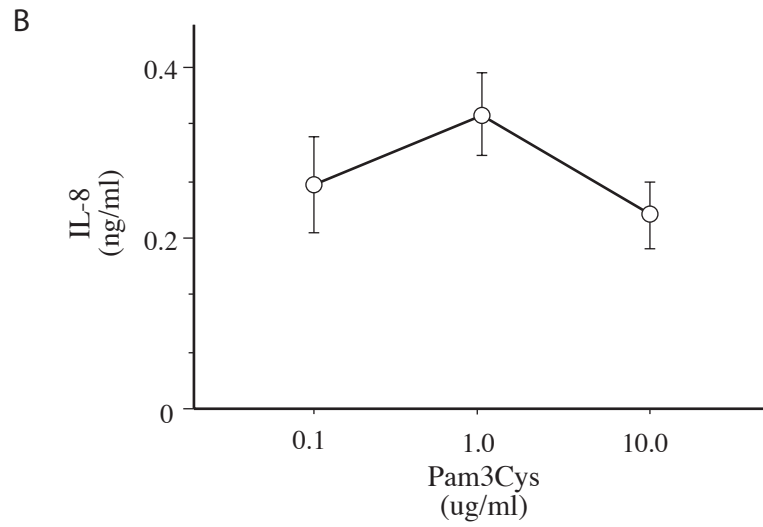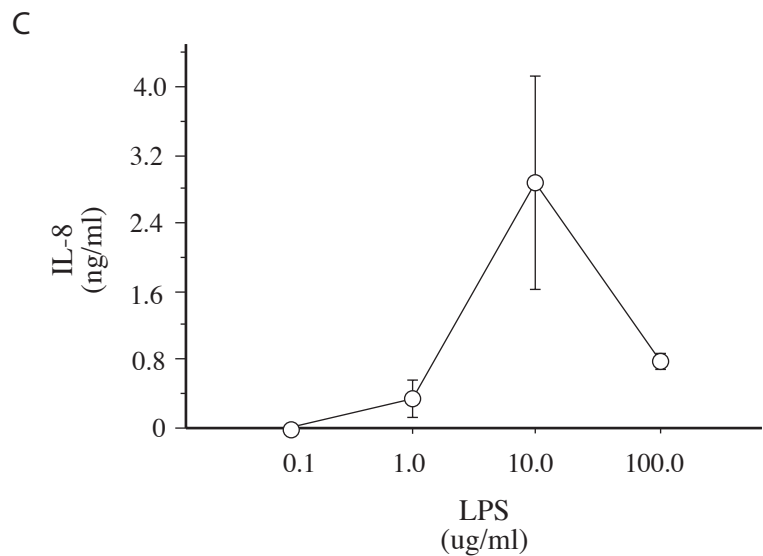

Online supplement Figure 1 - Dose-response curves are shown for IL-8 induction in response to NTHI (Panel A), Pam3Cys (Panel B) and LPS (Panel C). For all experiments, n=4.
