# Supplementary material for: Impaired innate immune alveolar macrophage response and the predilection for COPD exacerbations
Source: HighWire-hosted journal article supplement (doi:10.1136/thoraxjnl-2013-203669), 2014-03-31
Supplement: thoraxjnl-2013-203669supp_figure2.pdf [file thoraxjnl-2013-203669supp_figure2.pdf]

Pam3Cys

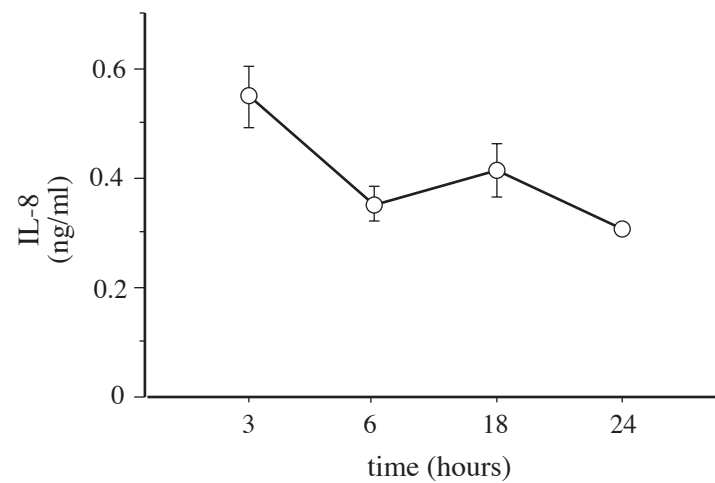

LPS

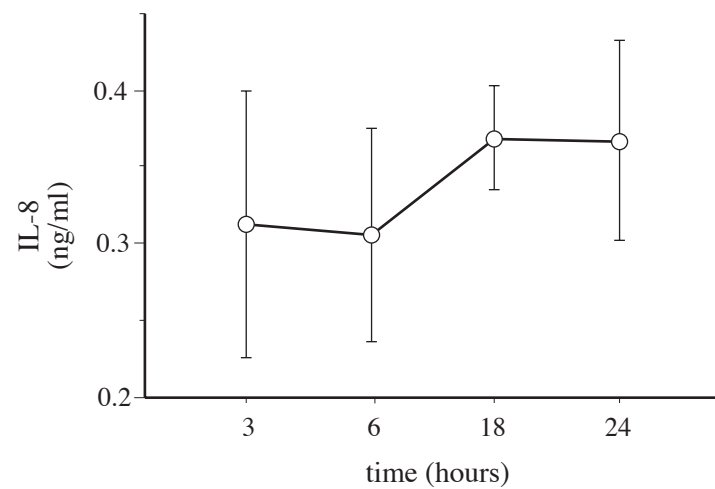

Online supplement Figure 2 - Time-response curves are shown for IL-8 induction in response to Pam3Cys (upper panel) and LPS (lower panel). For all experiments, n=4.
